# Supplementary material for: The Impact of Job Accommodations on Employment Outcomes Among Individuals With Psychiatric Disabilities
Source: Atypon-hosted journal article supplement (doi:10.1176/appi.ps.201300267), 2014-06-02
Supplement: 1126_ds001.pdf [file 1126_ds001.pdf]

## Variable Definitions, Relationship to Conceptual Model, and Hypothesized Relationships

| <i>Analytic Use</i><br>Conceptual Framework Factor<br>Variable | Type       | Definition                                                                                                                       | Avg. Hours<br>(Hypothesized<br>Relationship) | Employment<br>Duration<br>(Hypothesized<br>Relationship) |
|----------------------------------------------------------------|------------|----------------------------------------------------------------------------------------------------------------------------------|----------------------------------------------|----------------------------------------------------------|
| <i>Dependent Variables</i>                                     |            |                                                                                                                                  |                                              |                                                          |
| Employment Outcomes                                            |            |                                                                                                                                  |                                              |                                                          |
| Average Hours Worked (48 Months)                               | Continuous | Average of monthly hours worked across 48 months.                                                                                | N/A                                          | N/A                                                      |
| Duration of Employment                                         | Continuous | Days employed in each job.                                                                                                       | N/A                                          | N/A                                                      |
| <i>Explanatory Variables of Interest</i>                       |            |                                                                                                                                  |                                              |                                                          |
| Environmental Facilitators                                     |            |                                                                                                                                  |                                              |                                                          |
| Accommodation                                                  | Indicator  | 1 if respondent had any job across 48 months with reported job accommodation.                                                    | Positive                                     | N/A                                                      |
| # Accommodation                                                | Continuous | Total Number of accommodations associated with a specific job (in Employment Panel Dataset Only).                                | N/A                                          | Negative                                                 |
| <i>Covariates</i>                                              |            |                                                                                                                                  |                                              |                                                          |
| Activities Limitations                                         |            |                                                                                                                                  |                                              |                                                          |
| Phys Prob Affect Work                                          | Indicator  | 1 if respondent reports physical health has cut back on time spent at work over the 5 interview periods.                         | Negative                                     | Positive                                                 |
| Emot Prob Affect Work                                          | Indicator  | 1 if respondent reports emotional health has cut back on time spent at work over 5 interview periods.                            | Negative                                     | Positive                                                 |
| Went out Past Week                                             | Indicator  | 1 if respondent reports going out to a restaurant or for coffee in past week over 5 interview periods.                           | Positive                                     | Negative                                                 |
| Multiple Jobs                                                  | Indicator  | 1 if the respondents worked multiple jobs at any point during the study period.                                                  | N/A                                          | Negative                                                 |
| How often Talk w/Fam                                           | Ordinal    | Frequency of familial contacts calculated as average of 1(Not at all)-5(At least once a day) scale over the 5 interview periods. | Positive                                     | Negative                                                 |
| How Often See Family                                           | Ordinal    | Frequency of familial visits calculated as average of 1(Not at all)-5(At least once a day) scale over the 5 interview periods.   | Positive                                     | Negative                                                 |
| How Often Talk w/Non-family                                    | Ordinal    | Frequency of non-familial contacts calculated as average of 1(Not at all)-5(At                                                   | Positive                                     | Negative                                                 |

| <i>Analytic Use</i>                 |            |                                                                                                                                                                                             | Avg. Hours    | Employment    |
|-------------------------------------|------------|---------------------------------------------------------------------------------------------------------------------------------------------------------------------------------------------|---------------|---------------|
| Conceptual Framework Factor         |            |                                                                                                                                                                                             | (Hypothesized | Duration      |
| Variable                            | Type       | Definition                                                                                                                                                                                  | Relationship) | (Hypothesized |
|                                     |            |                                                                                                                                                                                             |               | Relationship) |
| How Often See Non-Family            | Ordinal    | least once a day) scale over the 5 interview periods.<br>Frequency of non-familial visits calculated as average of 1(Not at all)-5(At least once a day) scale over the 5 interview periods. | Positive      | Negative      |
| Environmental Barriers              |            |                                                                                                                                                                                             |               |               |
| Amount SSI                          | Continuous | Amount received in SSI in the previous month (current dollars) over the 5 interview periods.                                                                                                | Negative      | Positive      |
| Amount SSDI                         | Continuous | Amount received in SSDI in the previous month (current dollars) over the 5 interview periods                                                                                                | Negative      | Positive      |
| Unemployment Rate                   | Continuous | Monthly local prevailing unemployment rate at baseline.                                                                                                                                     | Negative      | Positive      |
| Environmental Facilitators          |            |                                                                                                                                                                                             |               |               |
| Rec'd Supported Employment Service  | Indicator  | 1 if the respondents has been randomly assigned to received supported employment services.                                                                                                  | Negative      | Negative      |
| Feelings about Family Relationships | Indicator  | 1 if the respondent is in supportive relationship with family over the 5 interview periods.                                                                                                 | Positive      | Negative      |
| Feelings on Social Relation         | Indicator  | 1 if the respondent is in supportive relationship with non-family over the 5 interview periods.                                                                                             | Positive      | Negative      |
| Health Status/Conditions            |            |                                                                                                                                                                                             |               |               |
| Schizophrenia                       | Indicator  | 1 if respondent has a schizophrenia spectrum disorder at baseline.                                                                                                                          | Negative      | Positive      |
| Overall Health                      | Indicator  | 1 if respondent reported good to excellent overall physical health over the 5 interview periods.                                                                                            | Positive      | Negative      |
| Blunted Affect                      | Ordinal    | Diminished emotional responsiveness calculated as average of 1(absent)-7(extreme) scale over the 5 interview periods.                                                                       | Negative      | Positive      |

| <i>Analytic Use</i>           |            |                                                                                                                                    | Avg. Hours    | Employment    |
|-------------------------------|------------|------------------------------------------------------------------------------------------------------------------------------------|---------------|---------------|
| Conceptual Framework Factor   |            |                                                                                                                                    | (Hypothesized | Duration      |
| Variable                      | Type       | Definition                                                                                                                         | Relationship) | (Hypothesized |
|                               |            |                                                                                                                                    |               | Relationship) |
| Social Withdrawal             | Ordinal    | Diminished interest in social interactions calculated as average of 1(absent)-7(extreme) scale over the 5 interview periods.       | Negative      | Positive      |
| Social Avoidance              | Ordinal    | Diminished social involvement in social interactions calculated as average of 1(absent)-7(extreme) scale over 5 interview periods. | Negative      | Positive      |
| Personal Factors- Demographic |            |                                                                                                                                    |               |               |
| Age at 2000                   | Continuous | Respondent age on January 1, 2000.                                                                                                 | Positive      | Negative      |
| Age at 2000-Squared           | Continuous | Respondent age on January 1, 2000 <sup>2</sup> .                                                                                   | Negative      | Positive      |
| Female                        | Indicator  | Female at baseline interview.                                                                                                      | Negative      | Positive      |
| White                         | Indicator  | Caucasian at baseline interview.                                                                                                   | Positive      | Negative      |
| Married                       | Indicator  | Married at baseline interview.                                                                                                     | Positive      | Positive      |
| Independently Housed          | Indicator  | 1 if the respondent is living in the community independently or with family at baseline interview.                                 | Positive      | Negative      |
| Kids < 18                     | Indicator  | Has children under age 18 living at home over the 5 interview periods.                                                             | Negative      | Positive      |
| Education                     | Ordinal    | Education completed as of baseline interview from 1(some elementary) to 10 (doctoral).                                             | Positive      | Negative      |
| Personal Factors- Economic    |            |                                                                                                                                    |               |               |
| # Months Employed 5yr         | Continuous | Total number of months with paying job in the previous 5 years prior to the baseline interview.                                    | Positive      | Negative      |
| Work Motivation               | Indicator  | 1 if the respondent believes more dignity and self-respect comes with working.                                                     | Positive      | Negative      |
| Economic Burden               | Indicator  | 1 if the respondent answered did not have enough money to cover food, clothing & shelter over the 5 interview periods.             | Positive      | Negative      |

\*These variables were estimated in the selection equation for model identification
